# Supplementary material for: High quality sub-10 nm graphene nanoribbons by on-chip PS-b-PDMS block copolymer lithography
Source: Royal Society of Chemistry journal article supplement (doi:10.1039/c5ra11735f), 2015-01-01
Supplement: c5ra11735f1.pdf [file c5ra11735f1.pdf]

**Supplementary Information for the manuscript: High quality sub-10 nm graphene nanoribbons by on-chip PS-*b*-PDMS block copolymer lithography, by Rasappa *et.al.***

1. SEM image shows the confinement of graphene nanoribbons inside the SU-8 trenches.
2. Raman Intensity map showing the spatial homogeneity of graphene nanoribbons after etching.

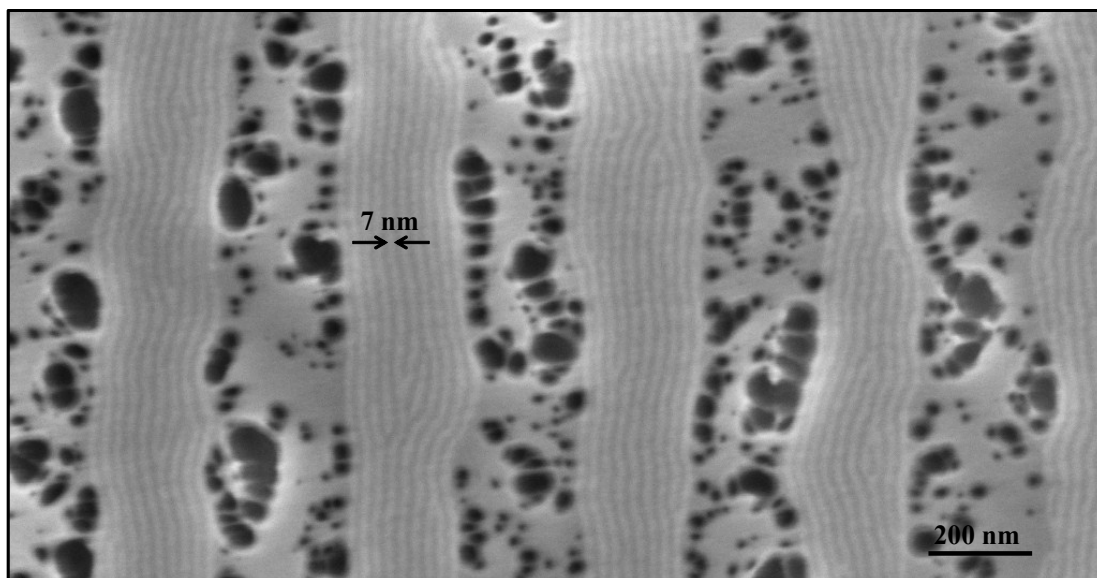

**Figure SI.1:** Confinement of graphene nanoribbons inside SU-8 trenches.

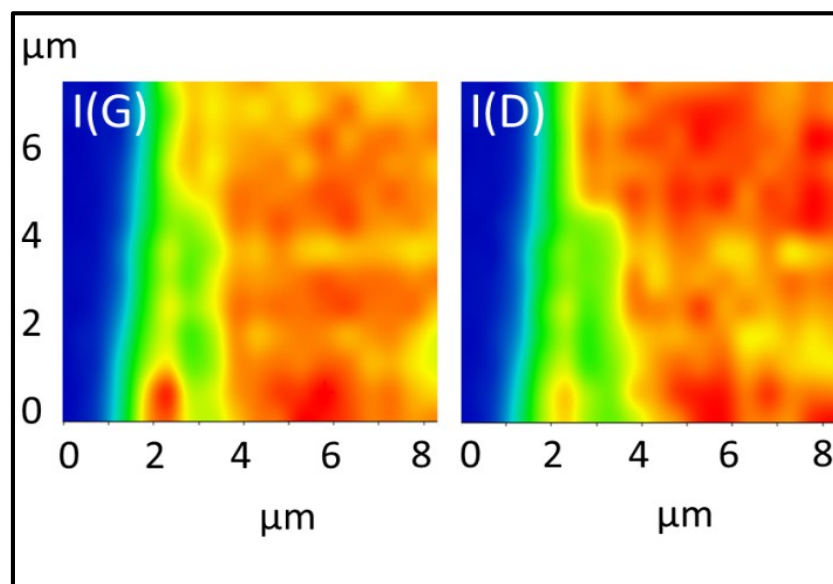

**Figure SI.2:** Raman maps of I(G) and I(D) of graphene nanoribbons showing the spatial homogeneity of the ribbon width during the etching process of graphene. The ratio of both values is  $\sim 1$  in all the positions, indicating the homogeneity achieved in the process. The spatial separation between the taken spectra is  $0.5 \mu\text{m}$  in both directions.
